# Supplementary material for: Triboelectric behaviour of selected MOFs in contact with metals
Source: Royal Society of Chemistry journal article supplement (doi:10.1039/d2ra06150c), 2022-12-20
Supplement: d2ra06150c1.pdf [file d2ra06150c1.pdf]

## Supporting Information

### Triboelectric behaviour of selected MOFs in contact with metals

Andris Šutka,<sup>\*a</sup> Fa-Kuen Shieh,<sup>b</sup> Martynas Kinka,<sup>c</sup> Linards Lapčinskis,<sup>a</sup> Chien-Chun Chang,<sup>b</sup> Phuc Khanh Lam,<sup>b</sup> Kaspars Pudzs,<sup>d</sup> and Osvalds Verners<sup>a</sup>

<sup>a</sup> Institute of Materials and Surface Engineering, Faculty of Materials Science and Applied Chemistry, Riga Technical University, Paula Valdena 3/7, Riga 1048, Latvia

<sup>b</sup> Department of Chemistry, National Central University, Taoyuan 32001, Taiwan

<sup>c</sup> Faculty of Physics, Vilnius University, Sauletekio av. 3, 10257 Vilnius, Lithuania

<sup>d</sup> Institute of Solid State Physics, University of Latvia, Kengaraga 8, Riga 1063, Latvia

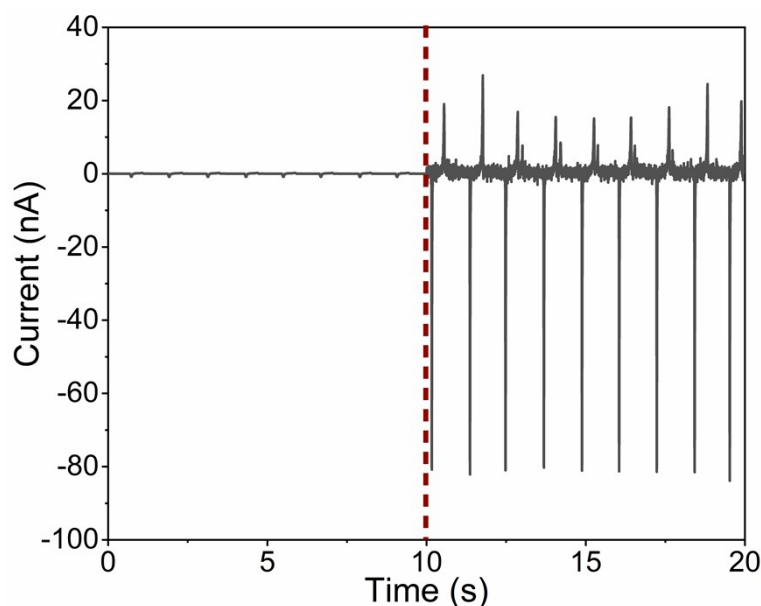

**Figure S1.** Current peaks generated during contact-separation of Al electrode against glass (left) and UiO-66-NH<sub>2</sub> covered glass (right).

**Table S1.** The pseudopotentials from [http://pseudopotentials.quantum-espresso.org/legacy\\_tables/ps-library](http://pseudopotentials.quantum-espresso.org/legacy_tables/ps-library) employed for DFT calculation of the work functions of MOFs.

| Element | Used pseudopotential           |
|---------|--------------------------------|
| Zn      | Zn.pbe-dnl-kjpaw_psl.1.0.0.UPF |
| O       | O.pbe-n-kjpaw_psl.1.0.0.UPF    |
| C       | C.pbe-n-kjpaw_psl.1.0.0.UPF    |
| H       | H.pbe-kjpaw_psl.1.0.0.UPF      |

|    |                                |
|----|--------------------------------|
| Zr | Zr.pbe-spn-kjpaw_psl.1.0.0.UPF |
| N  | N.pbe-n-kjpaw_psl.1.0.0.UPF    |

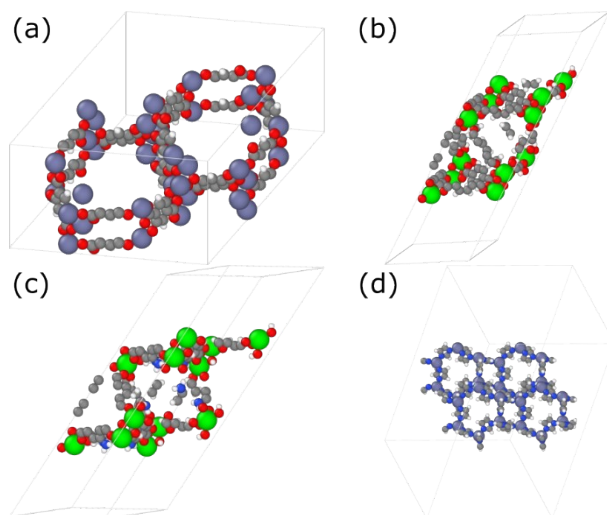

**Figure S2.** Geometries of 2-dimensionally periodic unit cells of (a) MOF-74 (adapted from [https://doi.org/10.1021/ja045123o]), (b) Ui-66 (adapted from [https://github.com/WMD-group/Crystal\_structures/tree/master/MOFs/UiO]), (c) UiO-66-NH<sub>2</sub> (adapted from [https://doi.org/10.1002/anie.201505461]), and (d) ZIF-8 (adapted from [https://doi.org/10.1039/B912997A]) (● – O, ● – H, ● – C, ● – N, ● – Zn, ● – Zr)

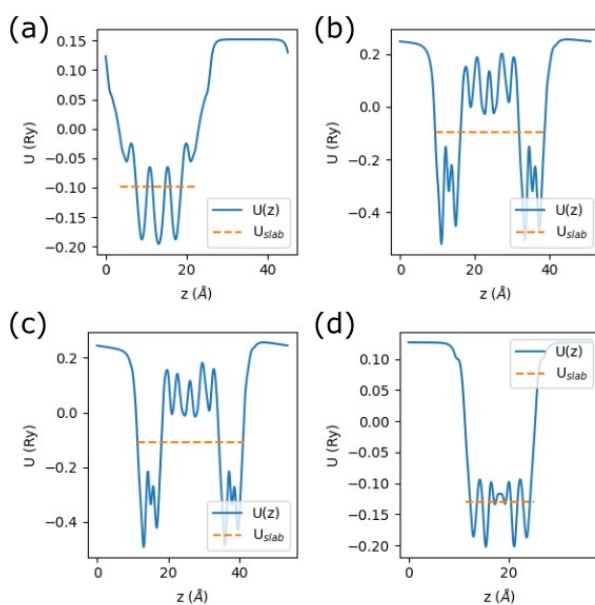

**Figure S3.** Surface-perpendicular distribution of electrostatic potential of 2-dimensionally periodic unit cells of (a) MOF-74, (b) Ui-66, (c) UiO-66-NH<sub>2</sub>, and (d) ZIF-8.

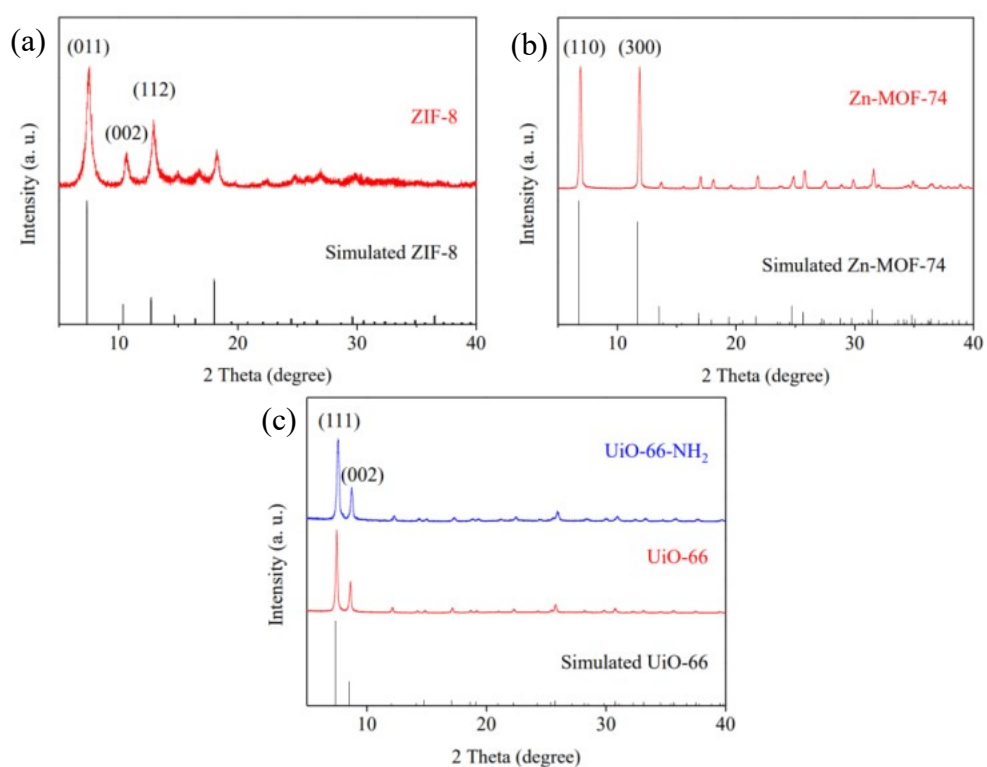

**Figure S4.** PXRD patterns of the synthesized and simulated (a) ZIF-8, (b) Zn-MOF-74, and (c) UiO-66, UiO-66-NH<sub>2</sub>.

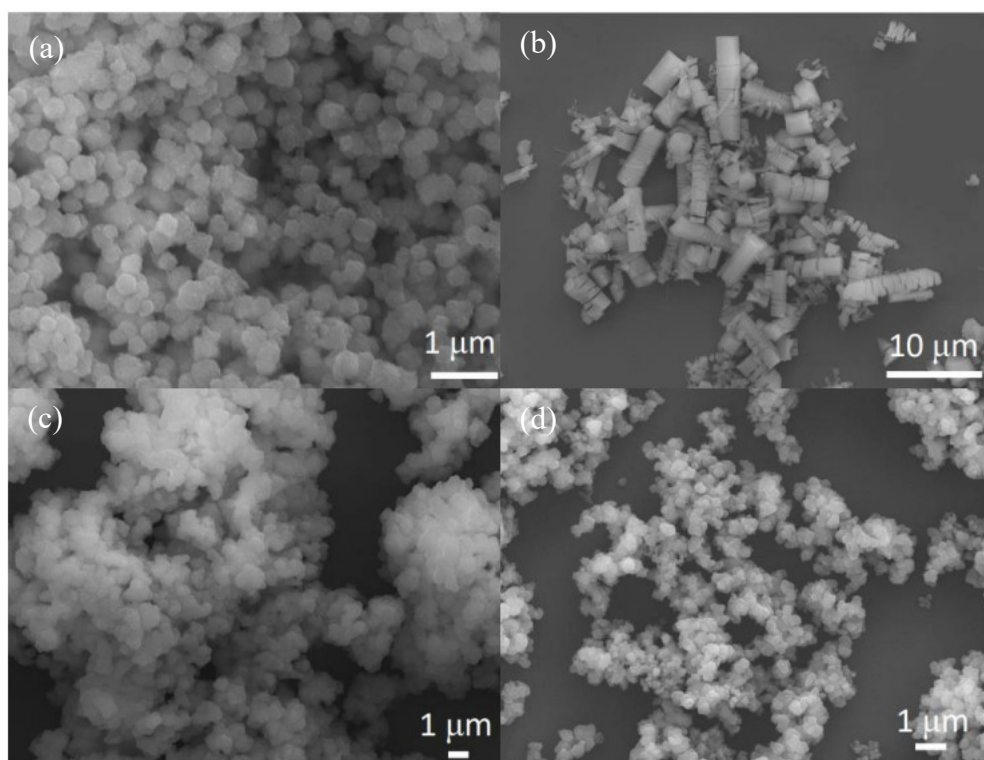

**Figure S5.** SEM images of (a) ZIF-8, (b) Zn-MOF-74, (c) UiO-66, and (d) UiO-66-NH<sub>2</sub>.

**Table S2.** The Ra surface roughness of electrodes used for contact-separation tests against MOF coatings.

| Electrode | Ra surface roughness, nm |
|-----------|--------------------------|
| Ag        | $62.0 \pm 15.4$          |
| Ti        | $55.4 \pm 16.1$          |
| Ni-Mo     | $25.1 \pm 1.8$           |
| Al        | $14.6 \pm 1.2$           |

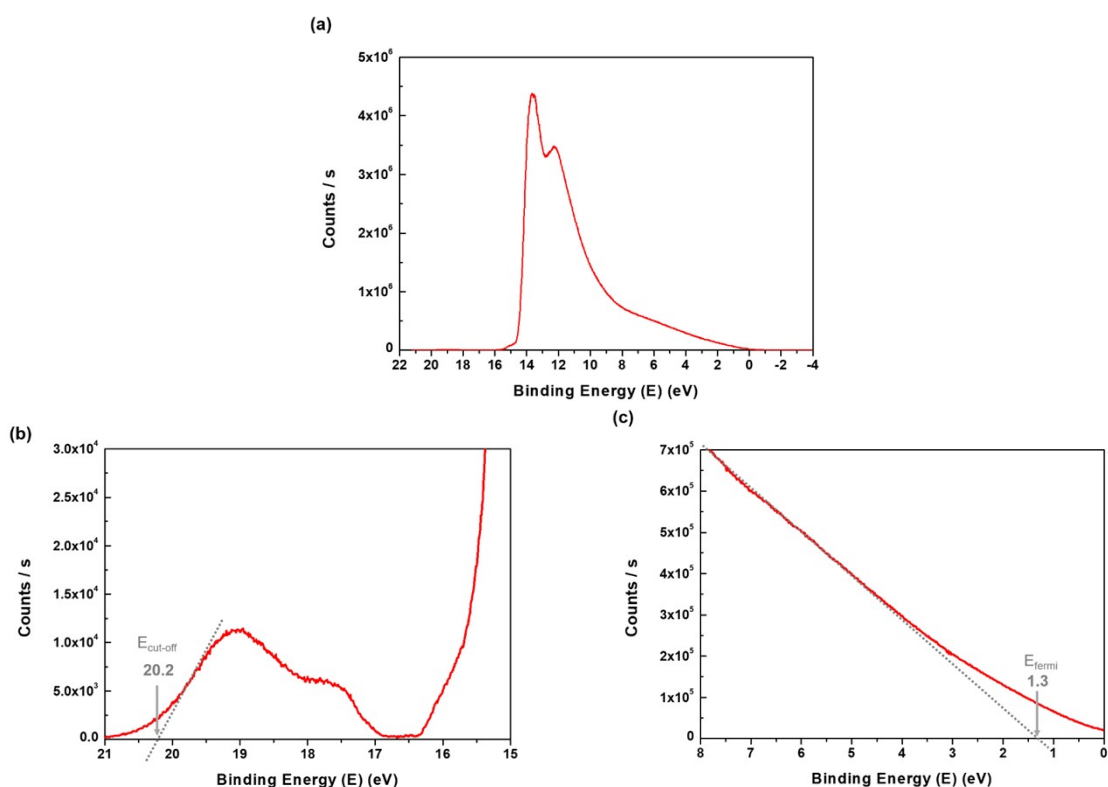

**Figure S6.** (a) Ultraviolet Photoelectron spectra (UPS) showing the binding energy of ZIF-8 (UV source is He I, 21.2 eV). The magnified version of UPS spectra (b) presenting the  $E_{\text{cut-off}}$  as 20.2 eV and (c) displaying the  $E_{\text{fermi}}$  as 1.3 eV.

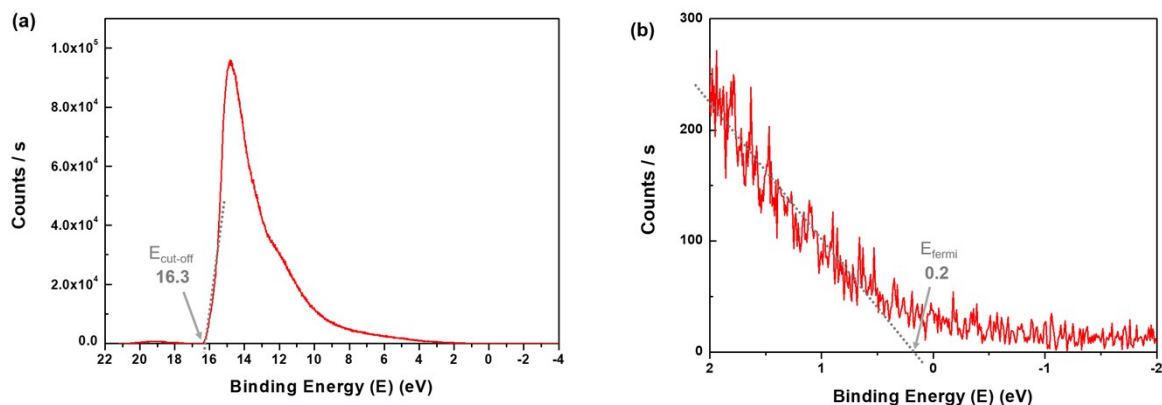

**Figure S7.** (a) Ultraviolet Photoelectron spectra (UPS) showing the binding energy of Zn-MOF-74 (UV source is He I, 21.2 eV) and the  $E_{\text{cut-off}}$  as 16.3 eV. (b) The magnified version of UPS spectra displaying the  $E_{\text{fermi}}$  as 0.2 eV.

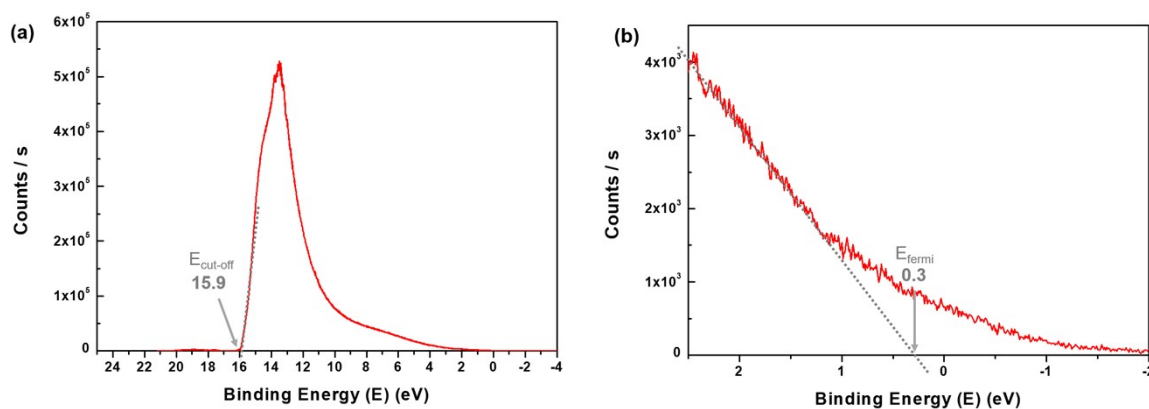

**Figure S8.** (a) Ultraviolet Photoelectron spectra (UPS) showing the binding energy of UiO-66 (UV source is He I, 21.2 eV) and the  $E_{\text{cut-off}}$  as 15.9 eV. (b) The magnified version of UPS spectra displaying the  $E_{\text{fermi}}$  as 0.3 eV.

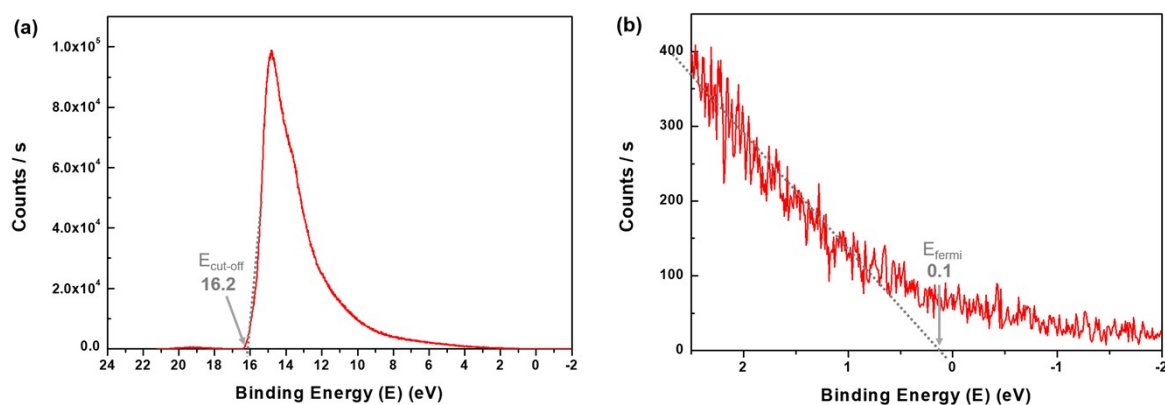

**Figure S9.** (a) Ultraviolet Photoelectron spectra (UPS) showing the binding energy of UiO-66-NH<sub>2</sub> (UV source is He I, 21.2 eV) and the  $E_{\text{cut-off}}$  as 16.2 eV. (b) The magnified version of UPS spectra displaying the  $E_{\text{fermi}}$  as 0.1 eV.

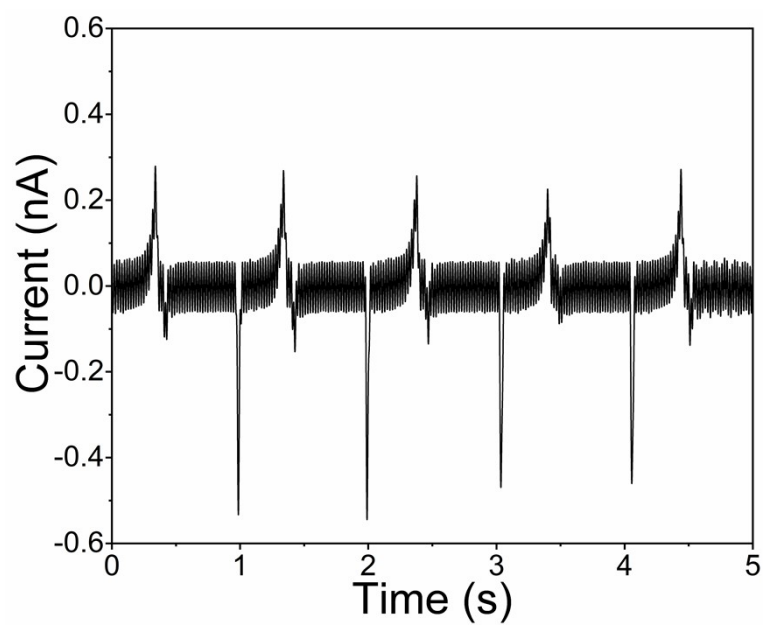

**Figure S10.** Current peaks of Al electrode in non-contact mode after contact with UiO-66.

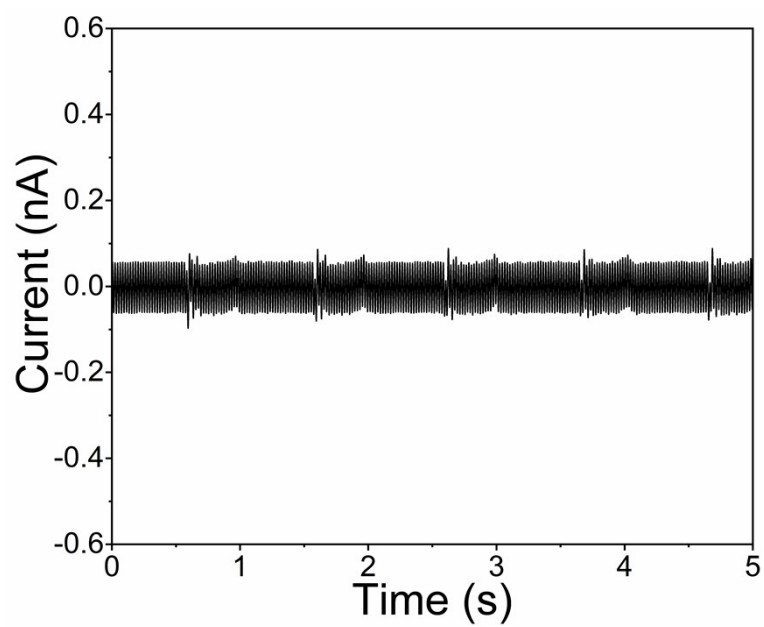

**Figure S11.** Current peaks of briefly grounded Al electrode in non-contact mode after contact with UiO-66.

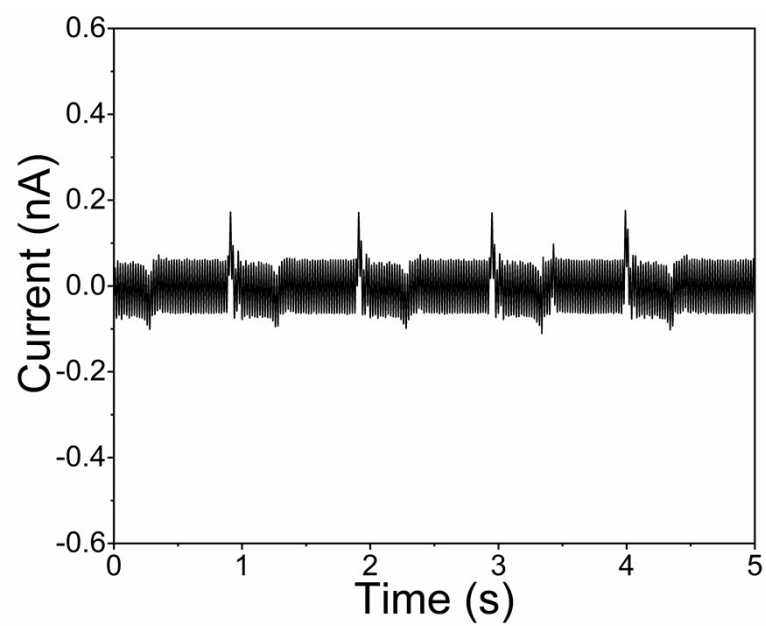

**Figure S12.** Current peaks of Al electrode in non-contact mode after contact with PDMS.

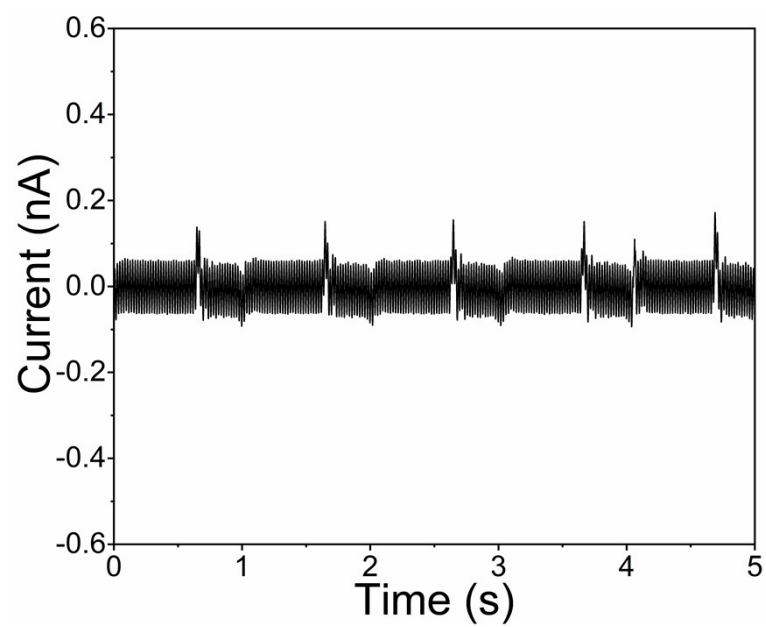

**Figure S13.** Current peaks of briefly grounded Al electrode in non-contact mode after contact with PDMS.
